# Supplementary material for: Dietary Intake of Individual (Intrinsic and Added) Sugars and Food Sources from Spanish Children Aged One to <10 Years—Results from the EsNuPI Study
Source: MDPI journal article supplement (doi:10.3390/nu14081667), 2022-04-16
Supplement: s1 [file s1]

**Table S1.** Main food groups and subgroups used in the EsNuPI study.

| <b>Group</b>                   | <b>Subgroups</b>                                                           |
|--------------------------------|----------------------------------------------------------------------------|
| <b>Cereals and derivatives</b> | Bread                                                                      |
|                                | Breakfast cereals                                                          |
|                                | Rice and pasta                                                             |
| <b>Milk and dairy products</b> | Fresh cheese and cured cheese                                              |
|                                | Milk: natural, standard (cow's, goat's...)                                 |
|                                | Milk: adapted formulas (infant, follow-on, toddler's, enriched, fortified) |
| <b>Other dairy products</b>    | Yogurt and kefir                                                           |
|                                | Condensed milk and cream                                                   |
|                                | Milk shakes and flavoured milk                                             |
|                                | Sweetened dairy desserts and ice cream                                     |
| <b>Eggs</b>                    | Eggs                                                                       |
| <b>Sugars and sweets</b>       | Chocolate and confectionery                                                |
|                                | Sugar, honey, and marmalade                                                |
|                                | Sugary cocoa, nougat                                                       |
| <b>Oils and fats</b>           | Margarine and butter                                                       |
|                                | Olive oil                                                                  |
|                                | Other vegetable oils and lard                                              |
| <b>Vegetables and potatoes</b> | All kind of vegetables                                                     |
|                                | Potatoes                                                                   |
| <b>Legumes</b>                 | Legumes                                                                    |
| <b>Fruits</b>                  | All kinds of fresh fruits                                                  |
|                                | Dried fruits                                                               |
|                                | Fruits with juice and fruits with syrup                                    |
|                                | Olives                                                                     |
| <b>Nuts</b>                    | Nuts                                                                       |
| <b>Meat and meat products</b>  | "Serrano" ham, cooked ham, sausages, other processed meats                 |
|                                | Chicken and turkey with or without skin, medium-fat meat, fatty pork,      |
|                                | Lamb meat, rabbit meat, or liver and other viscera                         |
| <b>Fish and shellfish</b>      | White fish, bluefish (small and large), fresh seafood, and canned fish     |
| <b>Beverages</b>               | Low-calorie carbonated beverages                                           |
|                                | Mixtures of fruit juice and milk                                           |
|                                | Natural juices and commercial juices                                       |
|                                | Sugar-sweetened carbonated beverages                                       |
| <b>Sauces and condiments</b>   | Sauces and Condiments                                                      |

|                                                        |                                |
|--------------------------------------------------------|--------------------------------|
| <b>Ready to<br/>cook/eat</b>                           | Homemade pre-cooked products   |
|                                                        | Industrial pre-cooked products |
| <b>Appetizers</b>                                      | Snacks (fried snacks)          |
| <b>Cereal-based<br/>baby foods and<br/>supplements</b> |                                |
| <b>Bakery products<br/>(Bakery and<br/>pastry)</b>     | Cookies and cakes              |
|                                                        | Homemade bakery products       |
|                                                        | Shortbread cookies             |
